# Supplementary material for: Parasitism by endoparasitoid wasps alters the internal but not the external microbiome in host caterpillars
Source: PubMed Central journal article supplement (PMC8520287; doi:10.1186/s42523-021-00135-y), 2021-10-15
Supplement: 42523_2021_135_MOESM2_ESM.pdf [file 42523_2021_135_MOESM2_ESM.pdf]

Figure S1

## Bacteria

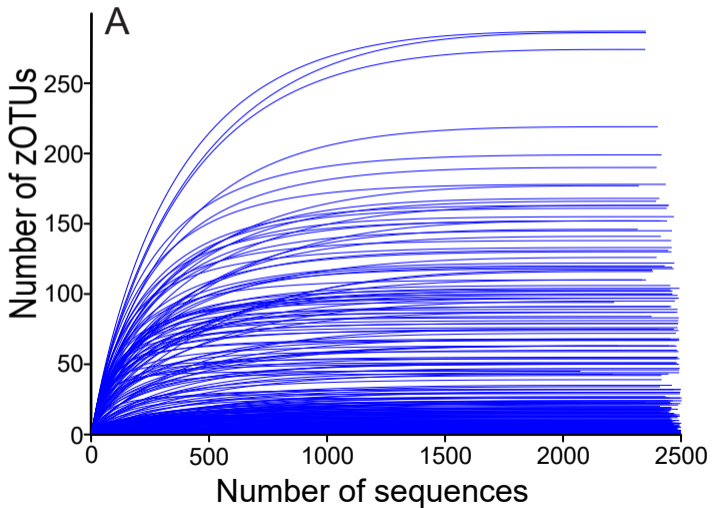

## Fungi

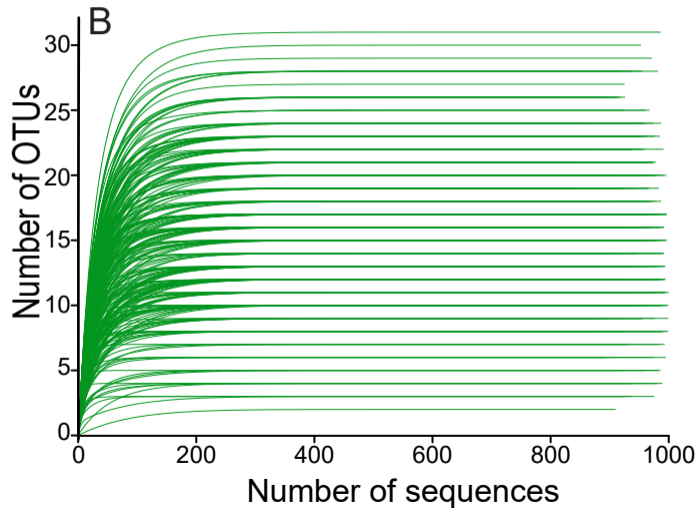

Figure S2

|                                 | Field-collected |      |      |      |        |      | Lab-reared   |      |      |      |        |      |
|---------------------------------|-----------------|------|------|------|--------|------|--------------|------|------|------|--------|------|
|                                 | Caterpillars    |      |      |      | Larvae |      | Caterpillars |      |      |      | Larvae |      |
|                                 | H-E             | P-E  | H-I  | P-I  | E      | I    | H-E          | P-E  | H-I  | P-I  | E      | I    |
|                                 |                 |      |      |      |        |      |              |      |      |      |        |      |
| <i>Alternaria</i>               | 13.3            | 9.5  | 6.3  | 9.2  | 10.0   | 7.2  | 26.5         | 22.5 | 13.5 | 9.8  | 3.2    | 5.7  |
| <i>Alternaria</i>               | 24.7            | 17.6 | 24.7 | 12.0 | 9.8    | 6.6  | 3.3          | 4.8  | 7.1  | 7.4  | 5.2    | 7.6  |
| <i>Sporobolomyces</i>           | 14.2            | 19.7 | 11.6 | 13.0 | 5.5    | 5.9  | 1.0          | 2.6  | 3.2  | 6.6  | 6.3    | 10.1 |
| <i>Exophiala</i>                |                 |      | <1.0 | 1.8  | 1.0    | 4.8  | <1.0         | <1.0 | <1.0 | <1.0 | 2.0    | <1.0 |
| <i>Mucor</i>                    | 2.6             | 1.3  | 4.2  | 5.2  | 2.8    | 3.1  | <1.0         | <1.0 | 1.7  | 1.4  | 1.4    | 1.1  |
| <i>Cladosporium</i>             | 2.5             | 3.1  | 2.8  | 1.6  | <1.0   | 1.8  | 7.7          | 1.8  | 4.6  | <1.0 |        | <1.0 |
| <i>Malassezia</i>               | <1.0            | <1.0 | 1.4  | 1.2  | 3.3    | 3.9  | <1.0         | 4.0  | 1.7  | 7.6  | 5.7    | 3.7  |
| <i>Debaryomyces</i>             | 1.2             | <1.0 | <1.0 | 1.6  | 3.5    | 3.9  | 1.1          | 1.3  | 1.1  | 3.1  | 3.0    | 2.0  |
| <i>Xylodon</i>                  | <1.0            | <1.0 | <1.0 | <1.0 | <1.0   | 2.1  | <1.0         | <1.0 | <1.0 | 2.0  | 2.8    | 4.1  |
| <i>Trametes</i>                 | <1.0            | <1.0 | <1.0 | <1.0 | 1.9    | 3.5  | <1.0         | <1.0 | 1.1  | 2.5  | 2.8    | 4.1  |
| <i>Stemphylium</i>              | 1.3             | 1.3  | <1.0 | <1.0 | <1.0   |      | 2.4          | <1.0 | 5.1  | <1.0 | <1.0   | <1.0 |
| <i>Aureobasidium</i>            | 1.3             | 2.5  | <1.0 | <1.0 | <1.0   | <1.0 | <1.0         | <1.0 | <1.0 | <1.0 | <1.0   | <1.0 |
| <i>Geosmithia</i>               | <1.0            |      | <1.0 |      | 1.2    | 1.2  | 5.1          | 1.5  | 2.5  | 1.5  | 1.0    | <1.0 |
| <i>Filobasidium</i>             | 2.7             | 4.4  | 2.2  | 2.4  | 1.4    | 1.4  | <1.0         | 1.1  | <1.0 | 1.5  | 1.5    | 2.2  |
| <i>Dissoconium</i> (98.8%)      |                 |      |      | 1.6  |        |      | <1.0         | <1.0 | <1.0 |      |        |      |
| <i>Cystofilobasidium</i>        | <1.0            | 8.2  | 2.3  | 4.5  | 2.1    | <1.0 | <1.0         | <1.0 | 2.0  | 1.5  | 1.2    | 3.9  |
| <i>Ganoderma</i>                | <1.0            | <1.0 | <1.0 | <1.0 | 1.1    | <1.0 | <1.0         |      | <1.0 | <1.0 | <1.0   |      |
| <i>Clitocybe</i>                | <1.0            | <1.0 | <1.0 | <1.0 | 4.1    | <1.0 | <1.0         | <1.0 | <1.0 | <1.0 | <1.0   | <1.0 |
| Pleosporales                    |                 |      | <1.0 |      | 2.4    | <1.0 |              |      |      |      |        | <1.0 |
| <i>Pyrenophora</i>              | 1.3             | 2.1  | 1.2  | <1.0 | <1.0   |      | <1.0         |      | <1.0 |      | <1.0   | <1.0 |
| <i>Alternaria</i>               | <1.0            | 1.2  | <1.0 | 1.2  | <1.0   | <1.0 | <1.0         | <1.0 | <1.0 | <1.0 | <1.0   | <1.0 |
| <i>Aspergillus</i>              |                 |      | <1.0 |      | <1.0   | <1.0 | 1.5          | 1.0  | 3.0  | 1.0  | <1.0   |      |
| <i>Gibellulopsis</i>            | 1.4             | <1.0 | 1.1  | 2.4  | 1.4    | <1.0 | 2.3          | 4.8  | 4.1  | 1.2  | <1.0   | 1.6  |
| <i>Armillaria</i>               |                 |      |      | <1.0 | <1.0   | 1.2  | <1.0         | 5.2  |      | <1.0 |        |      |
| <i>Plicaturopsis</i>            |                 |      |      | <1.0 | <1.0   | <1.0 | <1.0         | 3.9  | <1.0 | 2.6  | <1.0   | <1.0 |
| <i>Peniophora</i>               | <1.0            | <1.0 | <1.0 | <1.0 | 1.1    | <1.0 | <1.0         | <1.0 | <1.0 | <1.0 |        | <1.0 |
| <i>Alternaria</i>               | <1.0            | <1.0 | 1.1  | <1.0 |        |      |              |      |      |      |        |      |
| <i>Pyrenophora</i>              | 1.7             | <1.0 |      | <1.0 |        | <1.0 |              |      |      |      |        |      |
| <i>Filobasidium</i>             | 2.1             | 2.3  | 1.1  | 1.0  | <1.0   | 1.1  |              | 1.1  | <1.0 | <1.0 | 2.1    | <1.0 |
| <i>Thelebolus</i>               | 1.1             |      | <1.0 | <1.0 | <1.0   |      |              | <1.0 |      |      | <1.0   |      |
| <i>Vishniacozyma</i> (98.7%)    | 1.1             | 2.0  | <1.0 | 2.4  | 1.0    | 1.4  | <1.0         | <1.0 | <1.0 | 1.4  | 1.2    | 2.0  |
| <i>Alternaria</i>               | <1.0            |      | <1.0 | <1.0 | 1.5    | <1.0 |              | <1.0 | <1.0 | <1.0 | <1.0   | <1.0 |
| <i>Neodevriesia</i>             |                 |      |      | 1.9  |        |      |              |      |      |      |        |      |
| <i>Aspergillus</i>              | <1.0            |      | 1.7  | <1.0 | 3.8    | 2.6  | 1.1          | 1.2  | 1.7  | <1.0 | 4.1    | <1.0 |
| <i>Cladosporium</i>             |                 |      |      |      | <1.0   | <1.0 | 2.8          | <1.0 | 1.4  | <1.0 |        | <1.0 |
| <i>Itersonilia</i>              | <1.0            | <1.0 | 1.3  | 1.3  | 2.4    | <1.0 | <1.0         | 1.2  | <1.0 | 1.5  | 1.5    | 5.2  |
| <i>Epicoccum</i>                | 2.0             | 1.1  | 1.8  | 1.4  | <1.0   | 1.0  | 2.9          | 2.5  | <1.0 | <1.0 | <1.0   | <1.0 |
| <i>Aspergillus</i>              |                 |      |      |      | <1.0   |      |              |      | <1.0 | 5.6  | <1.0   |      |
| <i>(Globo)fomes</i>             | <1.0            | <1.0 | <1.0 | <1.0 | <1.0   | <1.0 |              |      |      | <1.0 | 1.0    | <1.0 |
| <i>Resinicium</i>               | <1.0            |      | <1.0 |      | <1.0   |      | <1.0         |      | <1.0 | <1.0 | 1.6    | <1.0 |
| <i>Gymnostellatospora</i>       |                 | <1.0 | <1.0 | <1.0 | 1.0    | <1.0 | <1.0         | <1.0 | <1.0 | 1.1  |        | <1.0 |
| <i>Exophiala</i>                |                 |      | <1.0 | 1.1  | <1.0   | <1.0 |              | <1.0 | <1.0 | <1.0 |        |      |
| Dothideomycetes                 | 1.7             |      |      |      |        |      |              |      | <1.0 |      |        |      |
| <i>Mucor</i>                    |                 | <1.0 |      | 1.3  | <1.0   |      |              | <1.0 |      |      |        |      |
| Hypocreales                     | <1.0            | <1.0 |      | <1.0 | <1.0   | 1.8  | <1.0         | 1.3  | <1.0 | <1.0 | <1.0   | <1.0 |
| <i>Ceriporiopsis</i>            |                 |      |      |      |        |      | 1.3          |      | <1.0 |      |        |      |
| <i>Puccinia</i>                 | <1.0            | <1.0 | 1.0  | 2.3  |        | <1.0 | <1.0         | <1.0 | <1.0 |      |        |      |
| Tremellaceae (98.7%)            | <1.0            | <1.0 | 1.7  | 1.2  | <1.0   | <1.0 |              | <1.0 | <1.0 | <1.0 | <1.0   | 1.1  |
| <i>Cystofilobasidium</i>        |                 |      |      |      |        |      |              |      |      |      | 4.5    |      |
| <i>Filobasidium</i>             | <1.0            | 1.7  | <1.0 | <1.0 | <1.0   | <1.0 | <1.0         | <1.0 |      | <1.0 | <1.0   | <1.0 |
| <i>Plectosphaerella</i> (98.8%) | <1.0            | <1.0 | <1.0 | <1.0 | <1.0   | <1.0 | 1.4          |      |      | <1.0 | <1.0   | <1.0 |
| <i>Peniophora</i>               | <1.0            | <1.0 |      | <1.0 | <1.0   | <1.0 | <1.0         | 1.2  | <1.0 | 1.4  | 1.3    | <1.0 |
| <i>Malassezia</i>               |                 |      | <1.0 | <1.0 | 2.5    |      | <1.0         |      |      |      |        |      |
| <i>Fusarium</i> (94.4%)         | 1.0             | 1.9  | <1.0 | <1.0 |        | <1.0 | <1.0         |      |      | <1.0 |        |      |
| <i>Polyporus</i>                |                 |      |      |      |        |      |              | 2.5  |      | <1.0 |        |      |
| <i>Xylodon</i>                  |                 | <1.0 |      |      |        |      | <1.0         |      |      | 1.9  |        | <1.0 |
| <i>Hyphodontia</i>              |                 |      |      | 1.3  | <1.0   |      |              |      |      |      |        |      |
| <i>Acremonium</i>               |                 |      | <1.0 |      |        |      | 1.2          |      | 1.2  |      |        | 1.7  |
| <i>Meyerozyma</i>               |                 |      |      |      | <1.0   | <1.0 | <1.0         | <1.0 | <1.0 | <1.0 |        | 1.1  |
| <i>Gibellulopsis</i> (98.8%)    | 1.0             | <1.0 | <1.0 | <1.0 | 1.0    | <1.0 | <1.0         | 2.8  | <1.0 | <1.0 | <1.0   | <1.0 |
| <i>Malassezia</i>               | <1.0            | <1.0 |      | <1.0 |        |      |              | <1.0 | <1.0 | <1.0 |        | 1.1  |
| <i>Itersonilia</i>              | <1.0            | <1.0 | <1.0 | <1.0 | <1.0   | <1.0 | <1.0         | <1.0 | 1.0  | 1.6  | <1.0   | <1.0 |
| <i>Melampsora</i>               | <1.0            | <1.0 |      |      |        |      |              |      | 1.0  |      | <1.0   | 1.2  |
| <i>Naganishia</i>               | <1.0            |      | <1.0 | <1.0 | 1.1    | <1.0 |              |      |      | <1.0 |        | 1.0  |
| <i>Rhodotorula</i>              | <1.0            |      |      |      | <1.0   | <1.0 | 1.6          | <1.0 | <1.0 | <1.0 | 3.5    | <1.0 |
| <i>Rhodotorula</i>              |                 |      |      |      |        | <1.0 | <1.0         | <1.0 | 2.5  |      |        |      |
| <i>Heterobasidion</i>           |                 |      | <1.0 |      |        |      |              |      |      |      | 1.9    |      |
| <i>Anthracosystis</i>           |                 |      |      |      |        |      | <1.0         | 1.3  | <1.0 |      |        | <1.0 |
| <i>Mucor</i>                    | <1.0            |      | <1.0 |      |        |      | 2.9          | 2.6  | 2.5  | <1.0 |        |      |
| <i>Physcia</i>                  | <1.0            | <1.0 |      | <1.0 |        | <1.0 | <1.0         |      |      | 1.6  |        | <1.0 |
| <i>Taphrina</i>                 | <1.0            |      |      |      |        |      |              | 1.1  | <1.0 | <1.0 |        |      |
| Pleosporales                    |                 | <1.0 | <1.0 |      | 1.3    | <1.0 |              | <1.0 |      | <1.0 | <1.0   | <1.0 |
| <i>Cystofilobasidium</i>        | <1.0            | 1.6  | <1.0 | <1.0 | <1.0   |      |              |      | <1.0 | <1.0 |        |      |
| <i>Fusarium</i>                 | 2.1             | <1.0 | <1.0 |      |        |      |              |      |      |      |        | <1.0 |
| <i>Cyberlindnera</i>            |                 |      |      |      |        | 2.5  |              |      | <1.0 |      |        |      |
| <i>Postia</i>                   |                 |      |      |      |        | 1.3  |              |      |      |      |        |      |
| <i>Dioszegia</i>                | <1.0            |      |      | 1.5  |        |      |              |      |      |      |        |      |
| <i>Beauveria</i>                | <1.0            |      |      |      |        |      |              | <1.0 | <1.0 |      | <1.0   | 1.5  |
| <i>Aspergillus</i>              | <1.0            |      | 2.0  |      | <1.0   |      |              |      |      |      |        |      |
| <i>Cystobasidium</i>            |                 |      | <1.0 |      | <1.0   | <1.0 | <1.0         |      |      | 1.2  | <1.0   |      |
| <i>Phialocephala</i> (98.2%)    |                 |      |      |      |        |      |              | 1.8  |      |      |        |      |
| <i>Cystobasidium</i>            |                 |      |      |      |        | <1.0 | <1.0         | <1.0 | 1.3  |      | <1.0   |      |
| <i>Phaeosphaeria</i>            |                 |      | 1.3  |      |        |      |              |      |      |      |        |      |
| <i>Exidia</i> (98.8%)           |                 |      |      |      |        |      | <1.0         |      |      |      |        | 1.0  |
| <i>Fomes</i>                    |                 | <1.0 |      |      |        |      |              |      | <1.0 | 1.3  | 2.2    | 1.9  |
| <i>Penicillium</i> (98.8%)      |                 |      | <1.0 |      | <1.0   | <1.0 | 1.3          | 1.5  | 1.8  | 1.2  | <1.0   | <1.0 |

Prevalence (%) 100 80 60 40 20 0
